# Supplementary material for: Relationship between Menopausal Hormone Therapy and Oral Cancer: A Cohort Study Based on the Health Insurance Database in South Korea
Source: MDPI journal article supplement (doi:10.3390/jcm11195848), 2022-10-02
Supplement: s1 [file s1]

**Supplementary table S1.** Menopausal hormones by group

| MHT (generic name)                                           | Brand name                                                                                                                |
|--------------------------------------------------------------|---------------------------------------------------------------------------------------------------------------------------|
| Tibolone                                                     |                                                                                                                           |
| Tibolone 2.5 mg                                              | Livial, Rabilone, Libolone, Libron, Live on, Liviem, Tiborisi, Tibolan, Tibiol, Pharmbio Korea Tibolone, Hyundai Tibolone |
| Combined estrogen plus progestin by manufacturer             |                                                                                                                           |
| Estradiol Hemihydrate 1.03 mg, Drospirenone 2 mg             | Angeliq                                                                                                                   |
| Estradiol Valerate 2 mg, Medroxyprogesterone Acetate 10 mg   | Divina                                                                                                                    |
| Estradiol Valerate 1 mg, Medroxyprogesterone Acetate 2.5 mg  | Indivina Tab 1 mg/2.5 mg                                                                                                  |
| Estradiol Valerate 1 mg, Medroxyprogesterone Acetate 5 mg    | Indivina Tab 1 mg/5 mg                                                                                                    |
| Estradiol Valerate 2 mg, Medroxyprogesterone Acetate 2.5 mg  | Indivina Tab 2 mg/2.5 mg                                                                                                  |
| Estradiol Hemihydrate 2 mg, Norethisterone Acetate 1 mg      | Cliane                                                                                                                    |
| Estradiol Hemihydrate 2.06 mg, Dydrogesterone 10 mg          | Femoston 2/10                                                                                                             |
| Estradiol Hemihydrate 1.03 mg, Dydrogesterone 10 mg          | Femoston 1/10                                                                                                             |
| Estradiol Hemihydrate 1.03 mg, Dydrogesterone 5 mg           | Femoston Conti                                                                                                            |
| Cyproterone Acetate 1 mg, Estradiol Valerate 2 mg            | Climen                                                                                                                    |
| Estradiol Hemihydrate 1.03 mg, Norethisterone Acetate 0.5 mg | Esdiol-half                                                                                                               |
| Estradiol Valerate 1.31 mg, Norethisterone Acetate 0.5 mg    | Cliovelle                                                                                                                 |
| Estrogen                                                     |                                                                                                                           |
| Conjugated Estrogens 0.3 mg                                  | Premina 0.3 mg                                                                                                            |
| Conjugated Estrogens 0.625 mg                                | Premina 0.625 mg                                                                                                          |
| Estradiol Valerate 1 mg                                      | Progynova 1 mg                                                                                                            |
| Estradiol Valerate 2 mg                                      | Progynova 2 mg                                                                                                            |
| Estradiol Hemihydrate 1 mg                                   | Preda 1 mg                                                                                                                |
| Combined estrogen plus progestin by physician <sup>a</sup>   |                                                                                                                           |
| Progesterone Micronized 100 mg                               | Utrogestan 100 mg                                                                                                         |
| Medroxyprogesterone Acetate 5 mg                             | Provera 5 mg                                                                                                              |
| Medroxyprogesterone Acetate 10 mg                            | Provera 10 mg                                                                                                             |
| Dydrogesterone 10 mg                                         | Duphaston                                                                                                                 |
| Topical estrogen                                             |                                                                                                                           |
| Estradiol Hemihydrate                                        | Estreva gel, Climara patch, Divigel gel                                                                                   |

MHT, menopausal hormone therapy

<sup>a</sup> This group used the progestin below and the estrogen group above simultaneously.

**Supplementary table S2.** Hazard ratios for oral cancer risk according to major variables, Korea National Health Insurance Data, 2002-2019

| Variables                                        | Formula 1 <sup>a</sup>   |         | Formula 2 <sup>b</sup>   |         |
|--------------------------------------------------|--------------------------|---------|--------------------------|---------|
|                                                  | HR (95% CI) <sup>a</sup> | P-value | HR (95% CI) <sup>b</sup> | P-value |
| MHT                                              |                          |         |                          |         |
| Tibolone                                         | 1.189 (1.048-1.349)      | 0.007   | 1.175 (1.031-1.338)      | 0.015   |
| Combined estrogen plus progestin by manufacturer | 1.076 (0.908-1.276)      | 0.398   | 1.095 (0.92-1.302)       | 0.307   |
| Oral estrogen                                    | 1.614 (1.337-1.947)      | <0.001  | 1.633 (1.35-1.976)       | <0.001  |
| Combined estrogen plus progestin by physician    | 1.563 (0.923-2.647)      | 0.097   | 1.516 (0.878-2.619)      | 0.136   |
| Topical estrogen                                 | 1.426 (0.534-3.807)      | 0.478   | 1.526 (0.572-4.074)      | 0.399   |
| Age at inclusion (years)                         |                          |         |                          |         |
| 50~59                                            | 1.587 (1.325-1.902)      | <0.001  | 1.464 (1.204-1.782)      | <0.001  |
| 60~69                                            | 3.113 (2.581-3.754)      | <0.001  | 2.316 (1.784-3.007)      | <0.001  |
| 70~                                              | 4.514 (3.676-5.545)      | <0.001  | 3.219 (2.408-4.303)      | <0.001  |
| BMI (kg/m <sup>2</sup> )                         |                          |         |                          |         |
| <18.5                                            | 1.112 (0.82-1.507)       | 0.496   | 1.106 (0.813-1.506)      | 0.521   |
| 23-24.9                                          | 1.011 (0.907-1.127)      | 0.841   | 0.996 (0.892-1.113)      | 0.945   |
| 25-29.9                                          | 1.114 (1.008-1.232)      | 0.035   | 1.076 (0.97-1.192)       | 0.165   |
| ≥30                                              | 1.031 (0.832-1.276)      | 0.782   | 1.03 (0.83-1.279)        | 0.788   |
| SES                                              |                          |         |                          |         |
| Low SES                                          | 1.491 (1.204-1.846)      | <0.001  | 1.465 (1.173-1.828)      | <0.001  |
| Region                                           |                          |         |                          |         |
| Rural area                                       | 1.684 (1.52-1.865)       | <0.001  | 1.707 (1.535-1.897)      | <0.001  |
| CCI                                              |                          |         |                          |         |
| 1                                                | 1.181 (1.067-1.306)      | 0.001   | 1.165 (1.051-1.293)      | 0.004   |
| ≥2                                               | 1.132 (1.007-1.271)      | 0.037   | 1.118 (0.992-1.26)       | 0.067   |
| Parity (years)                                   |                          |         |                          |         |
| 0                                                | 2.348 (1.841-2.995)      | <0.001  | 2.296 (1.792-2.942)      | <0.001  |
| 2                                                | 1.049 (0.837-1.316)      | 0.677   | 1.024 (0.814-1.289)      | 0.839   |
| ≥3                                               | 3.076 (2.435-3.885)      | <0.001  | 2.979 (2.349-3.777)      | <0.001  |
| Age at menarche (years)                          |                          |         |                          |         |
| ≥13                                              | 0.885 (0.778-1.007)      | 0.064   | 1.115 (0.977-1.273)      | 0.107   |
| Age at menopause (years)                         |                          |         |                          |         |
| 45-49                                            | 1.134 (0.984-1.307)      | 0.083   | 1.158 (0.998-1.343)      | 0.053   |
| 50-54                                            | 1.071 (0.929-1.234)      | 0.347   | 1.171 (0.999-1.373)      | 0.051   |
| 55-                                              | 0.972 (0.797-1.187)      | 0.784   | 1.142 (0.908-1.438)      | 0.257   |
| Smoking                                          |                          |         |                          |         |

**Supplementary table 2.** *cont*

|                                            |                     |        |
|--------------------------------------------|---------------------|--------|
| Past                                       | 0.882 (0.573-1.358) | 0.569  |
| Current                                    | 1.068 (0.834-1.368) | 0.601  |
| Alcohol (g/week)                           |                     |        |
| ~2/week                                    | 0.999 (0.875-1.14)  | 0.983  |
| 3~6/week                                   | 0.88 (0.596-1.3)    | 0.521  |
| Daily                                      | 0.656 (0.34-1.264)  | 0.208  |
| Physical exercise (per week)               |                     |        |
| 1~2                                        | 0.932 (0.827-1.05)  | 0.249  |
| 3~4                                        | 0.725 (0.612-0.859) | <0.001 |
| 5~6                                        | 0.785 (0.595-1.036) | 0.088  |
| Daily                                      | 1.217 (1.052-1.409) | 0.008  |
| Period from menopause to inclusion (years) |                     |        |
| 5~9                                        | 1.065 (0.929-1.222) | 0.367  |
| 10~                                        | 1.324 (1.106-1.586) | 0.002  |

BMI, Body mass index; CCI, Charlson comorbidity index; CI, confidence interval; HR, hazard ratio; MHT, menopausal hormone therapy; SES, socioeconomic status.

<sup>a</sup> HRs were adjusted for age group, body mass index, socioeconomic status, region, Charlson comorbidity index, parity, age at menarche, age at menopause.

<sup>b</sup> HRs were adjusted for age group, body mass index, socioeconomic status, region, Charlson comorbidity index, parity, age at menarche, age at menopause, smoking, alcohol, physical exercise, period from menopause to inclusion.
